# Supplementary figures and images for: Computational classification of mitochondrial shapes reflects stress and redox state
Source: PubMed Central journal article supplement — Cell Death Dis. 2013 Jan 17;4(1):e461–. doi: 10.1038/cddis.2012.213 (PMC3564000; doi:10.1038/cddis.2012.213), 2013-01-17

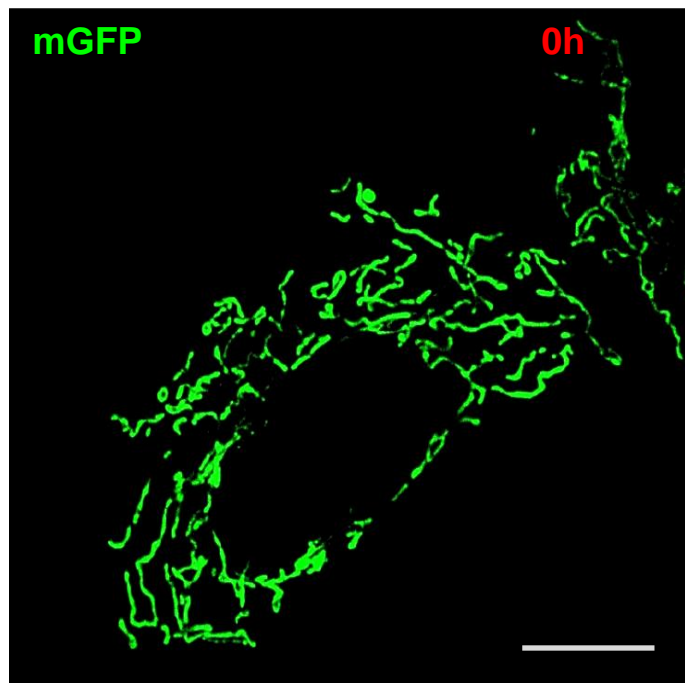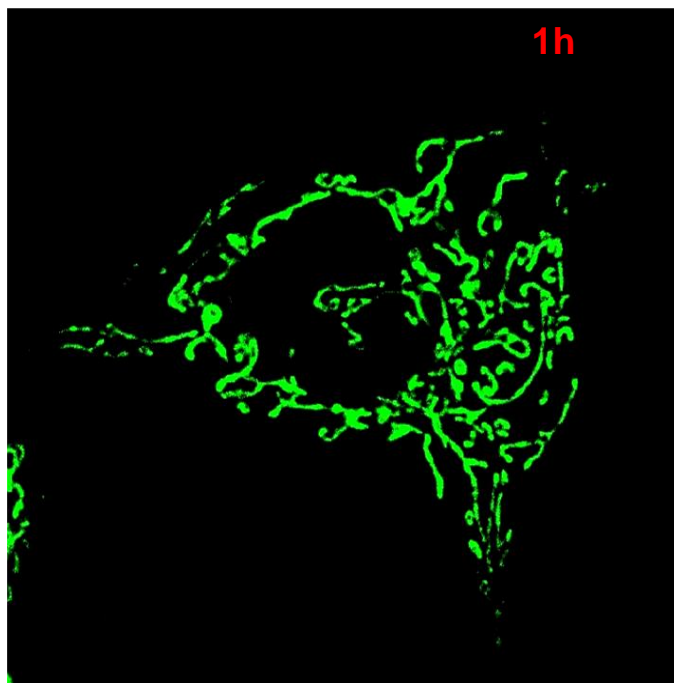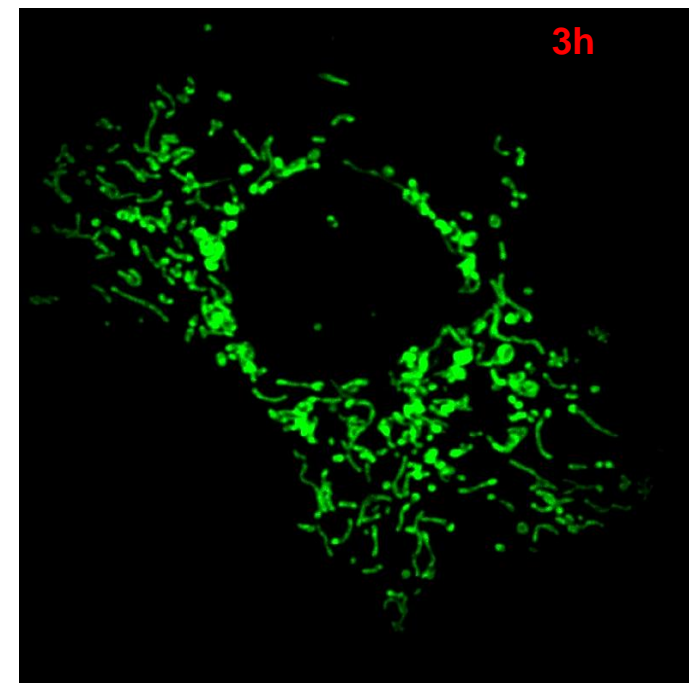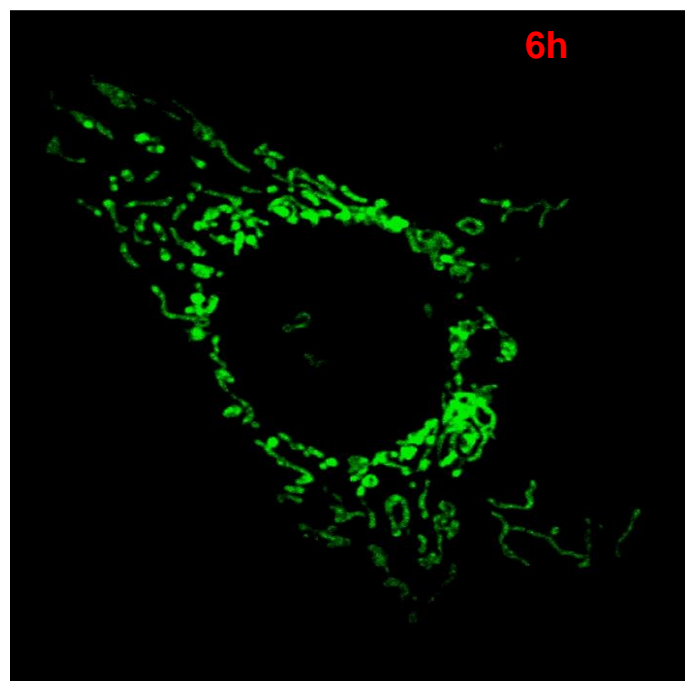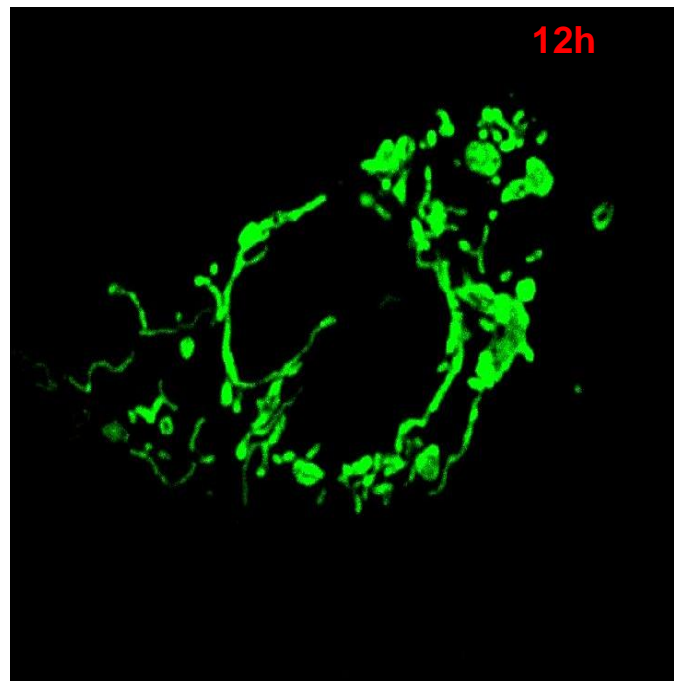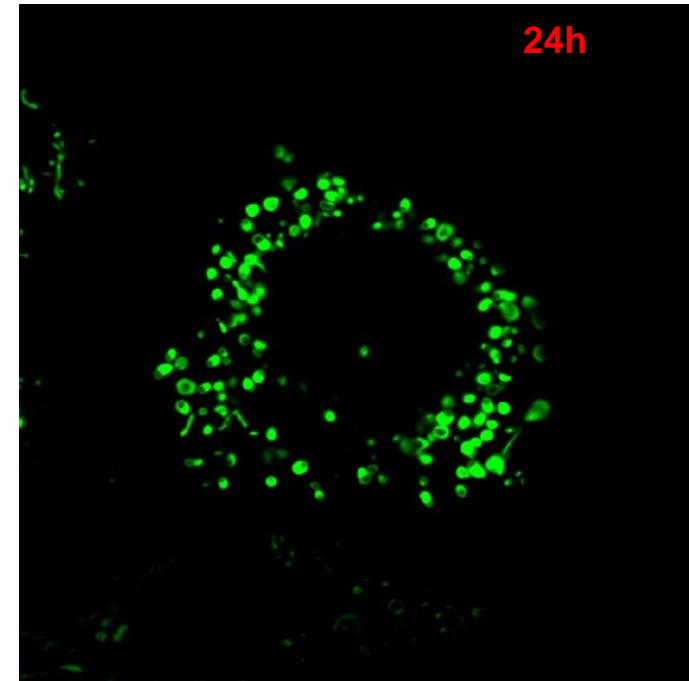

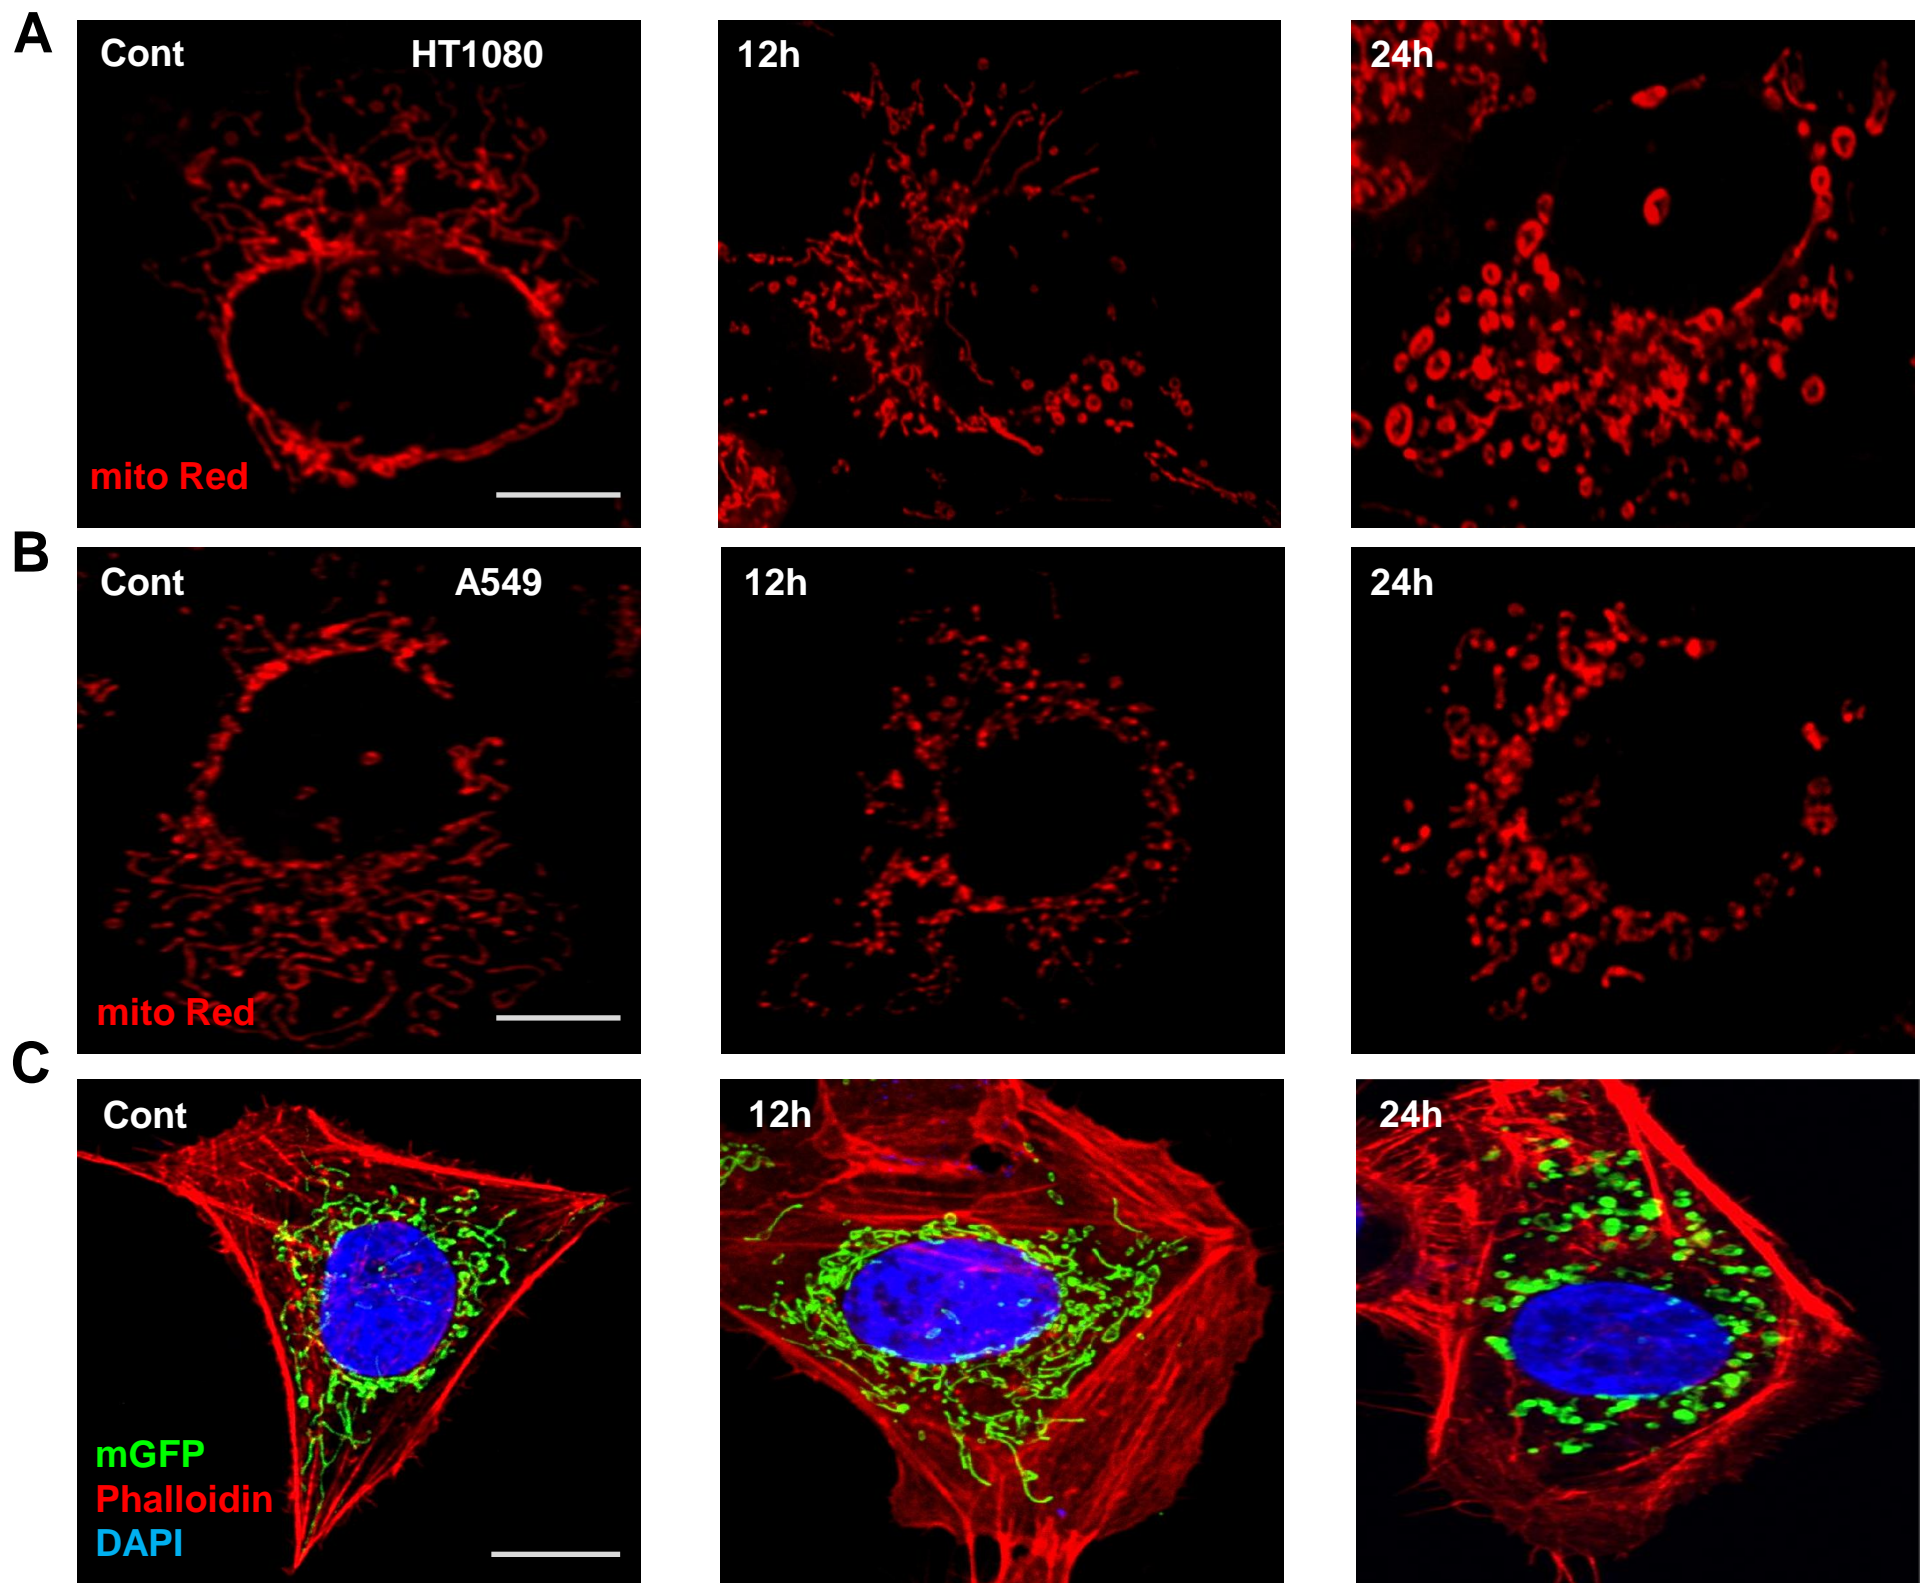

Supplementary Figure S2

**A**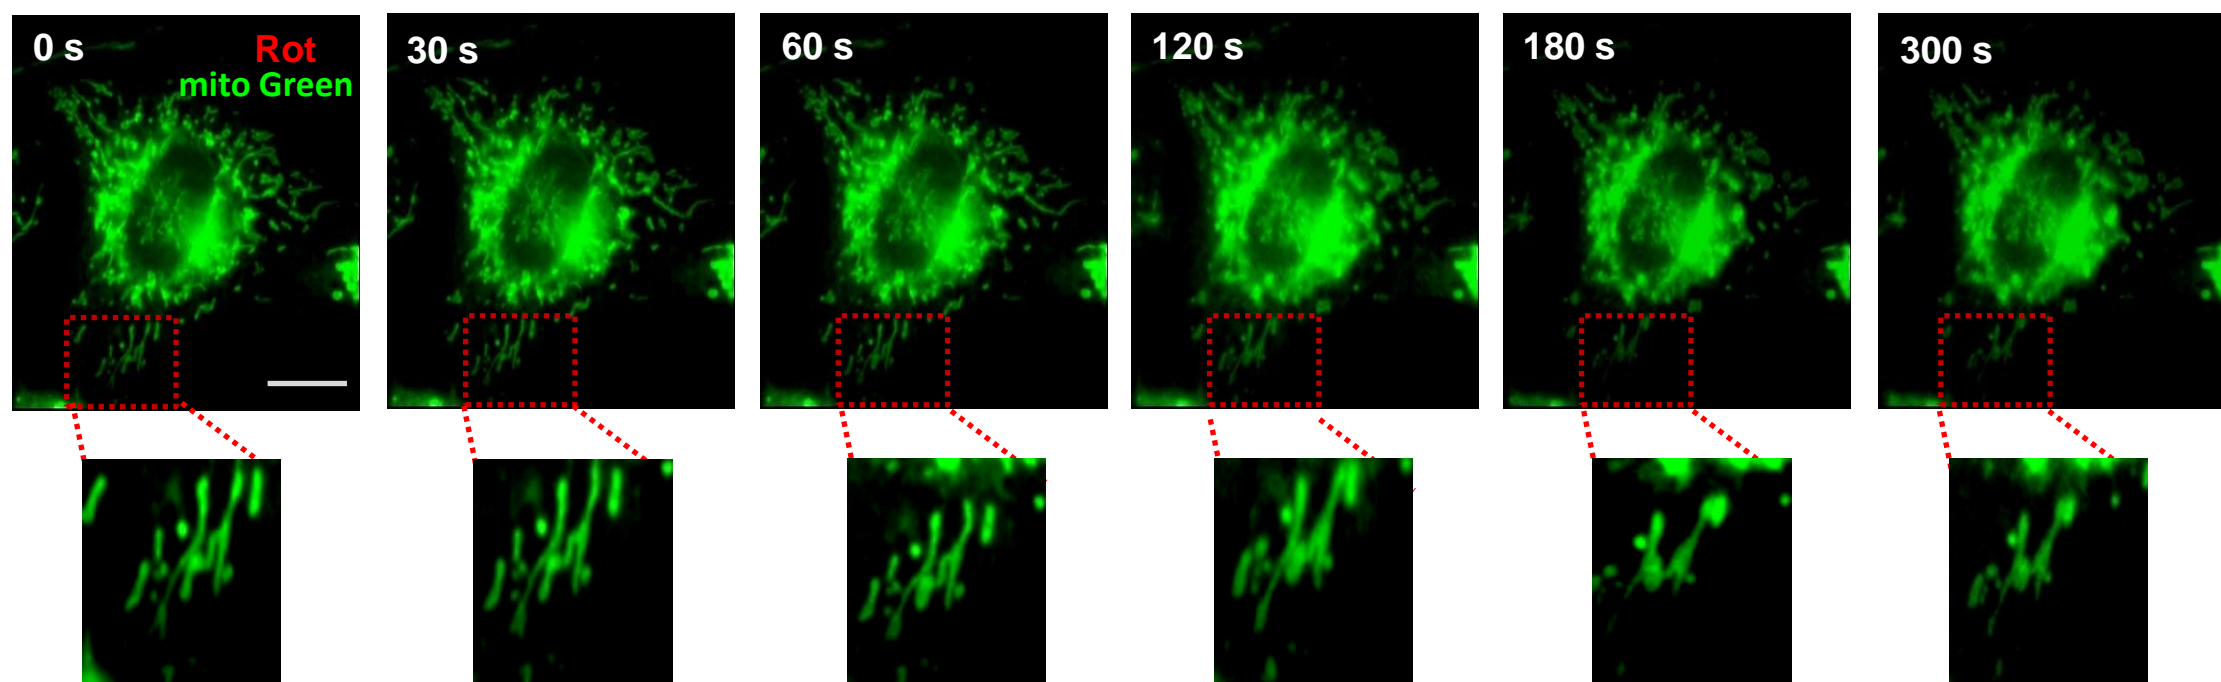**B**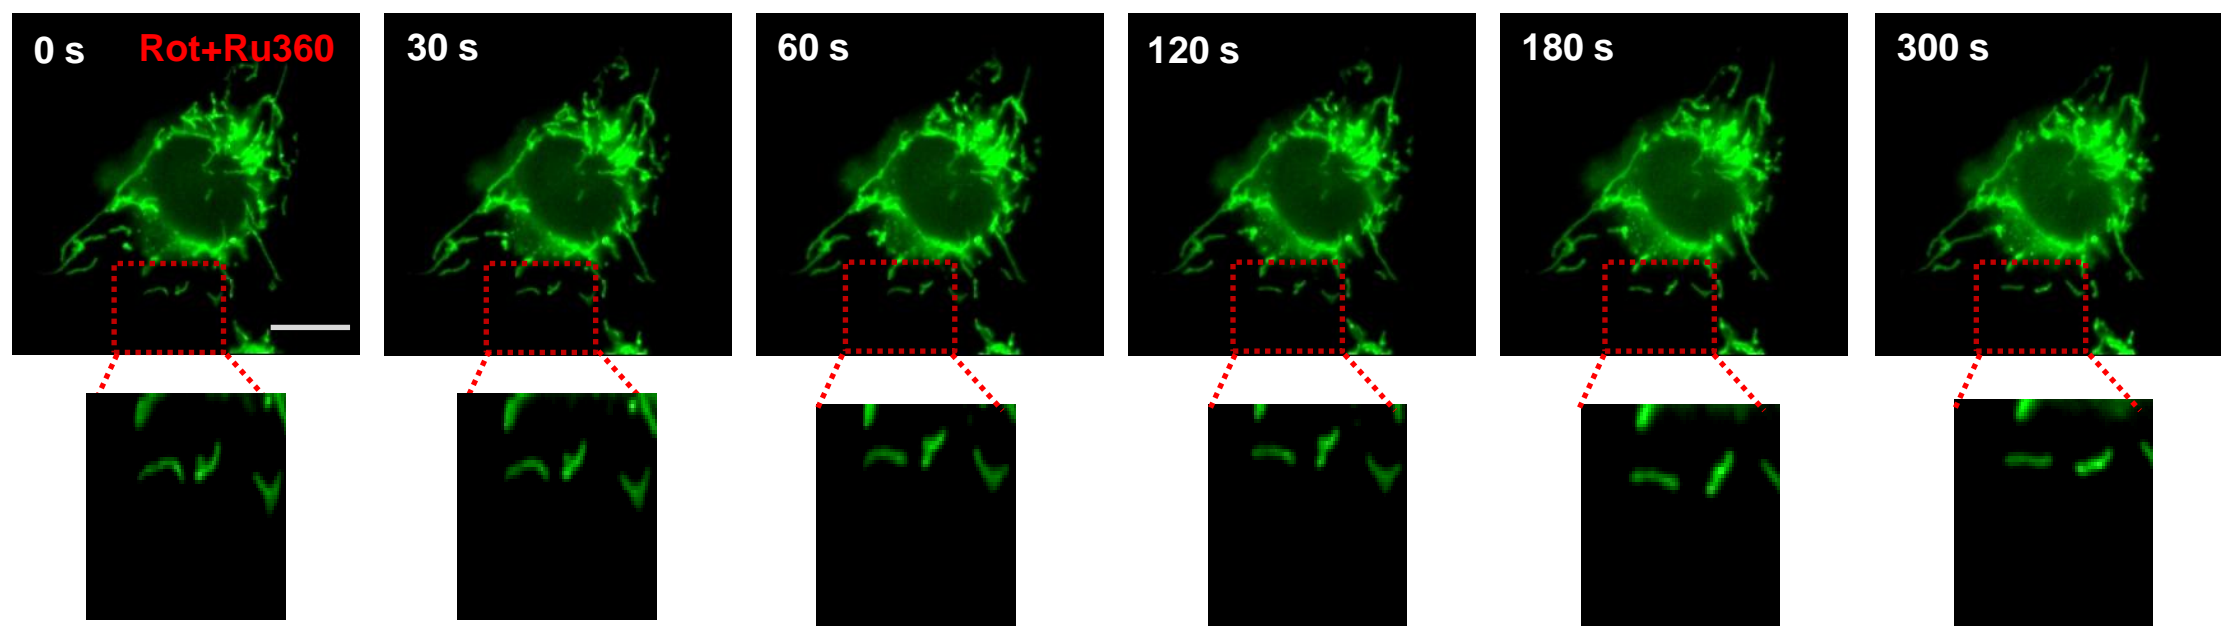



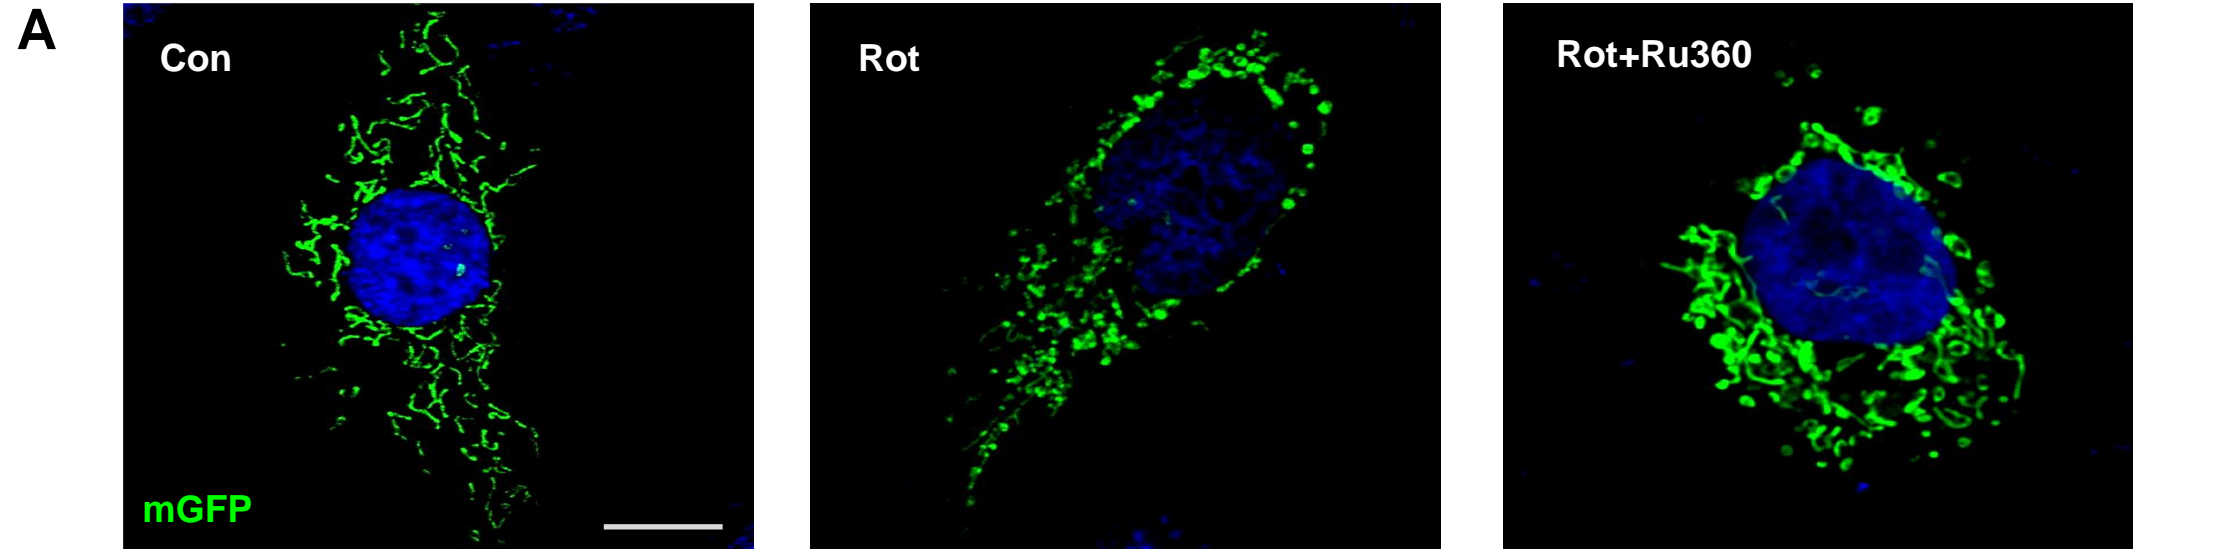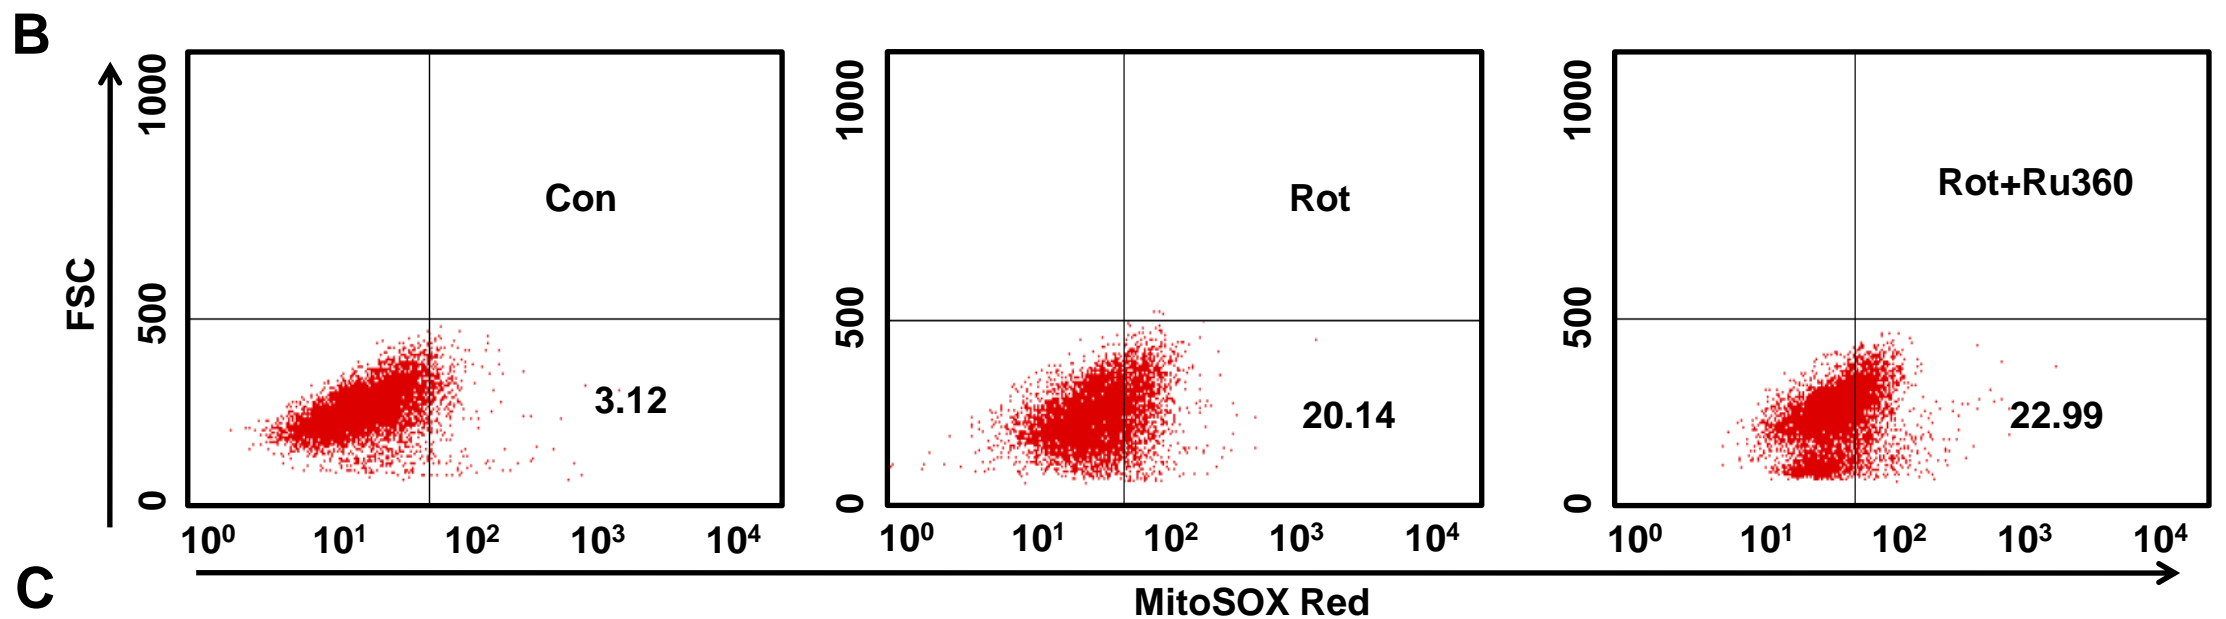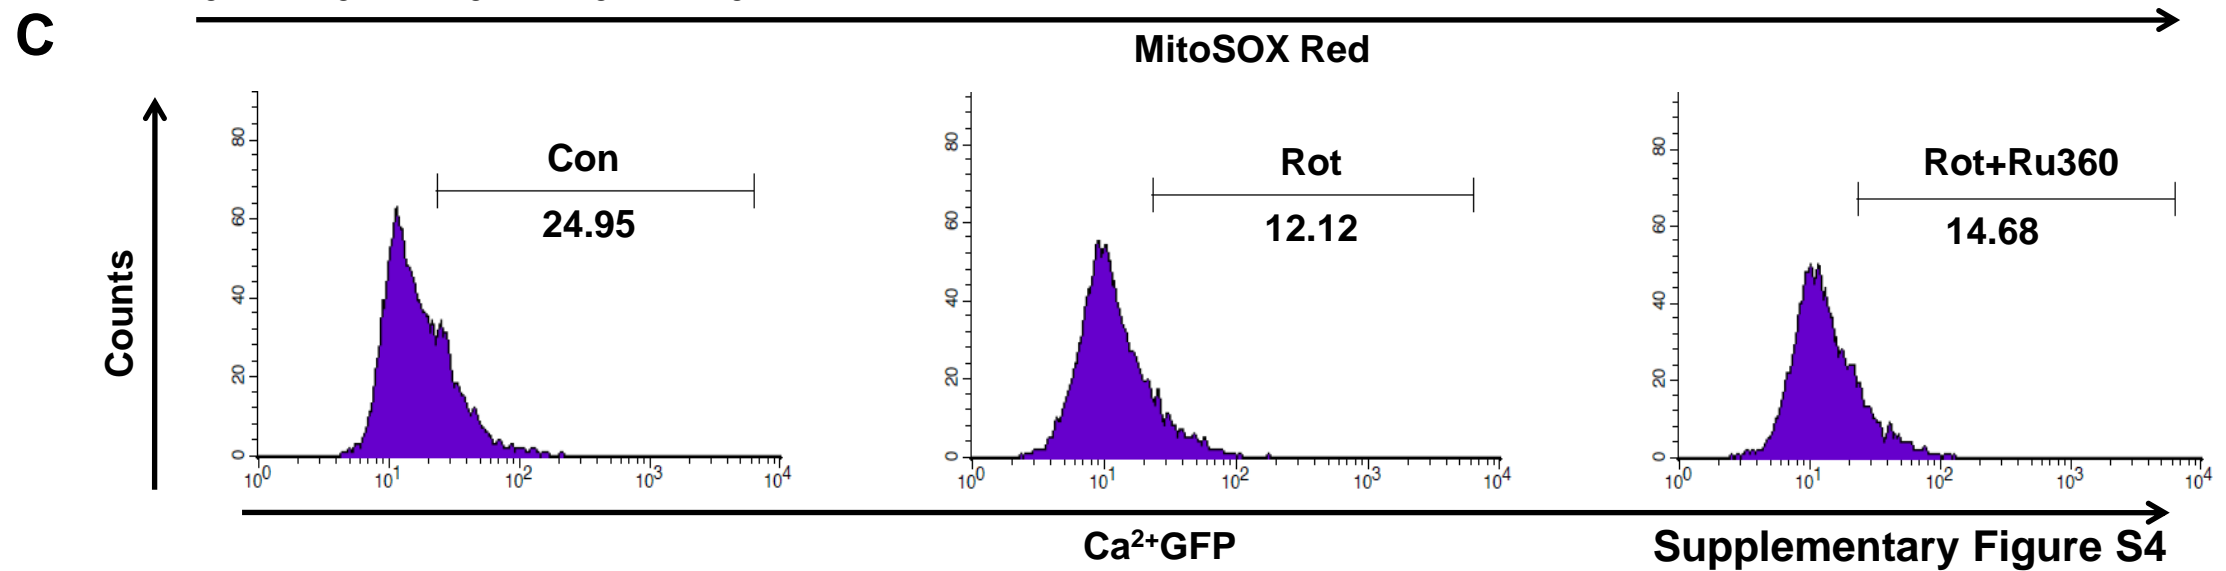

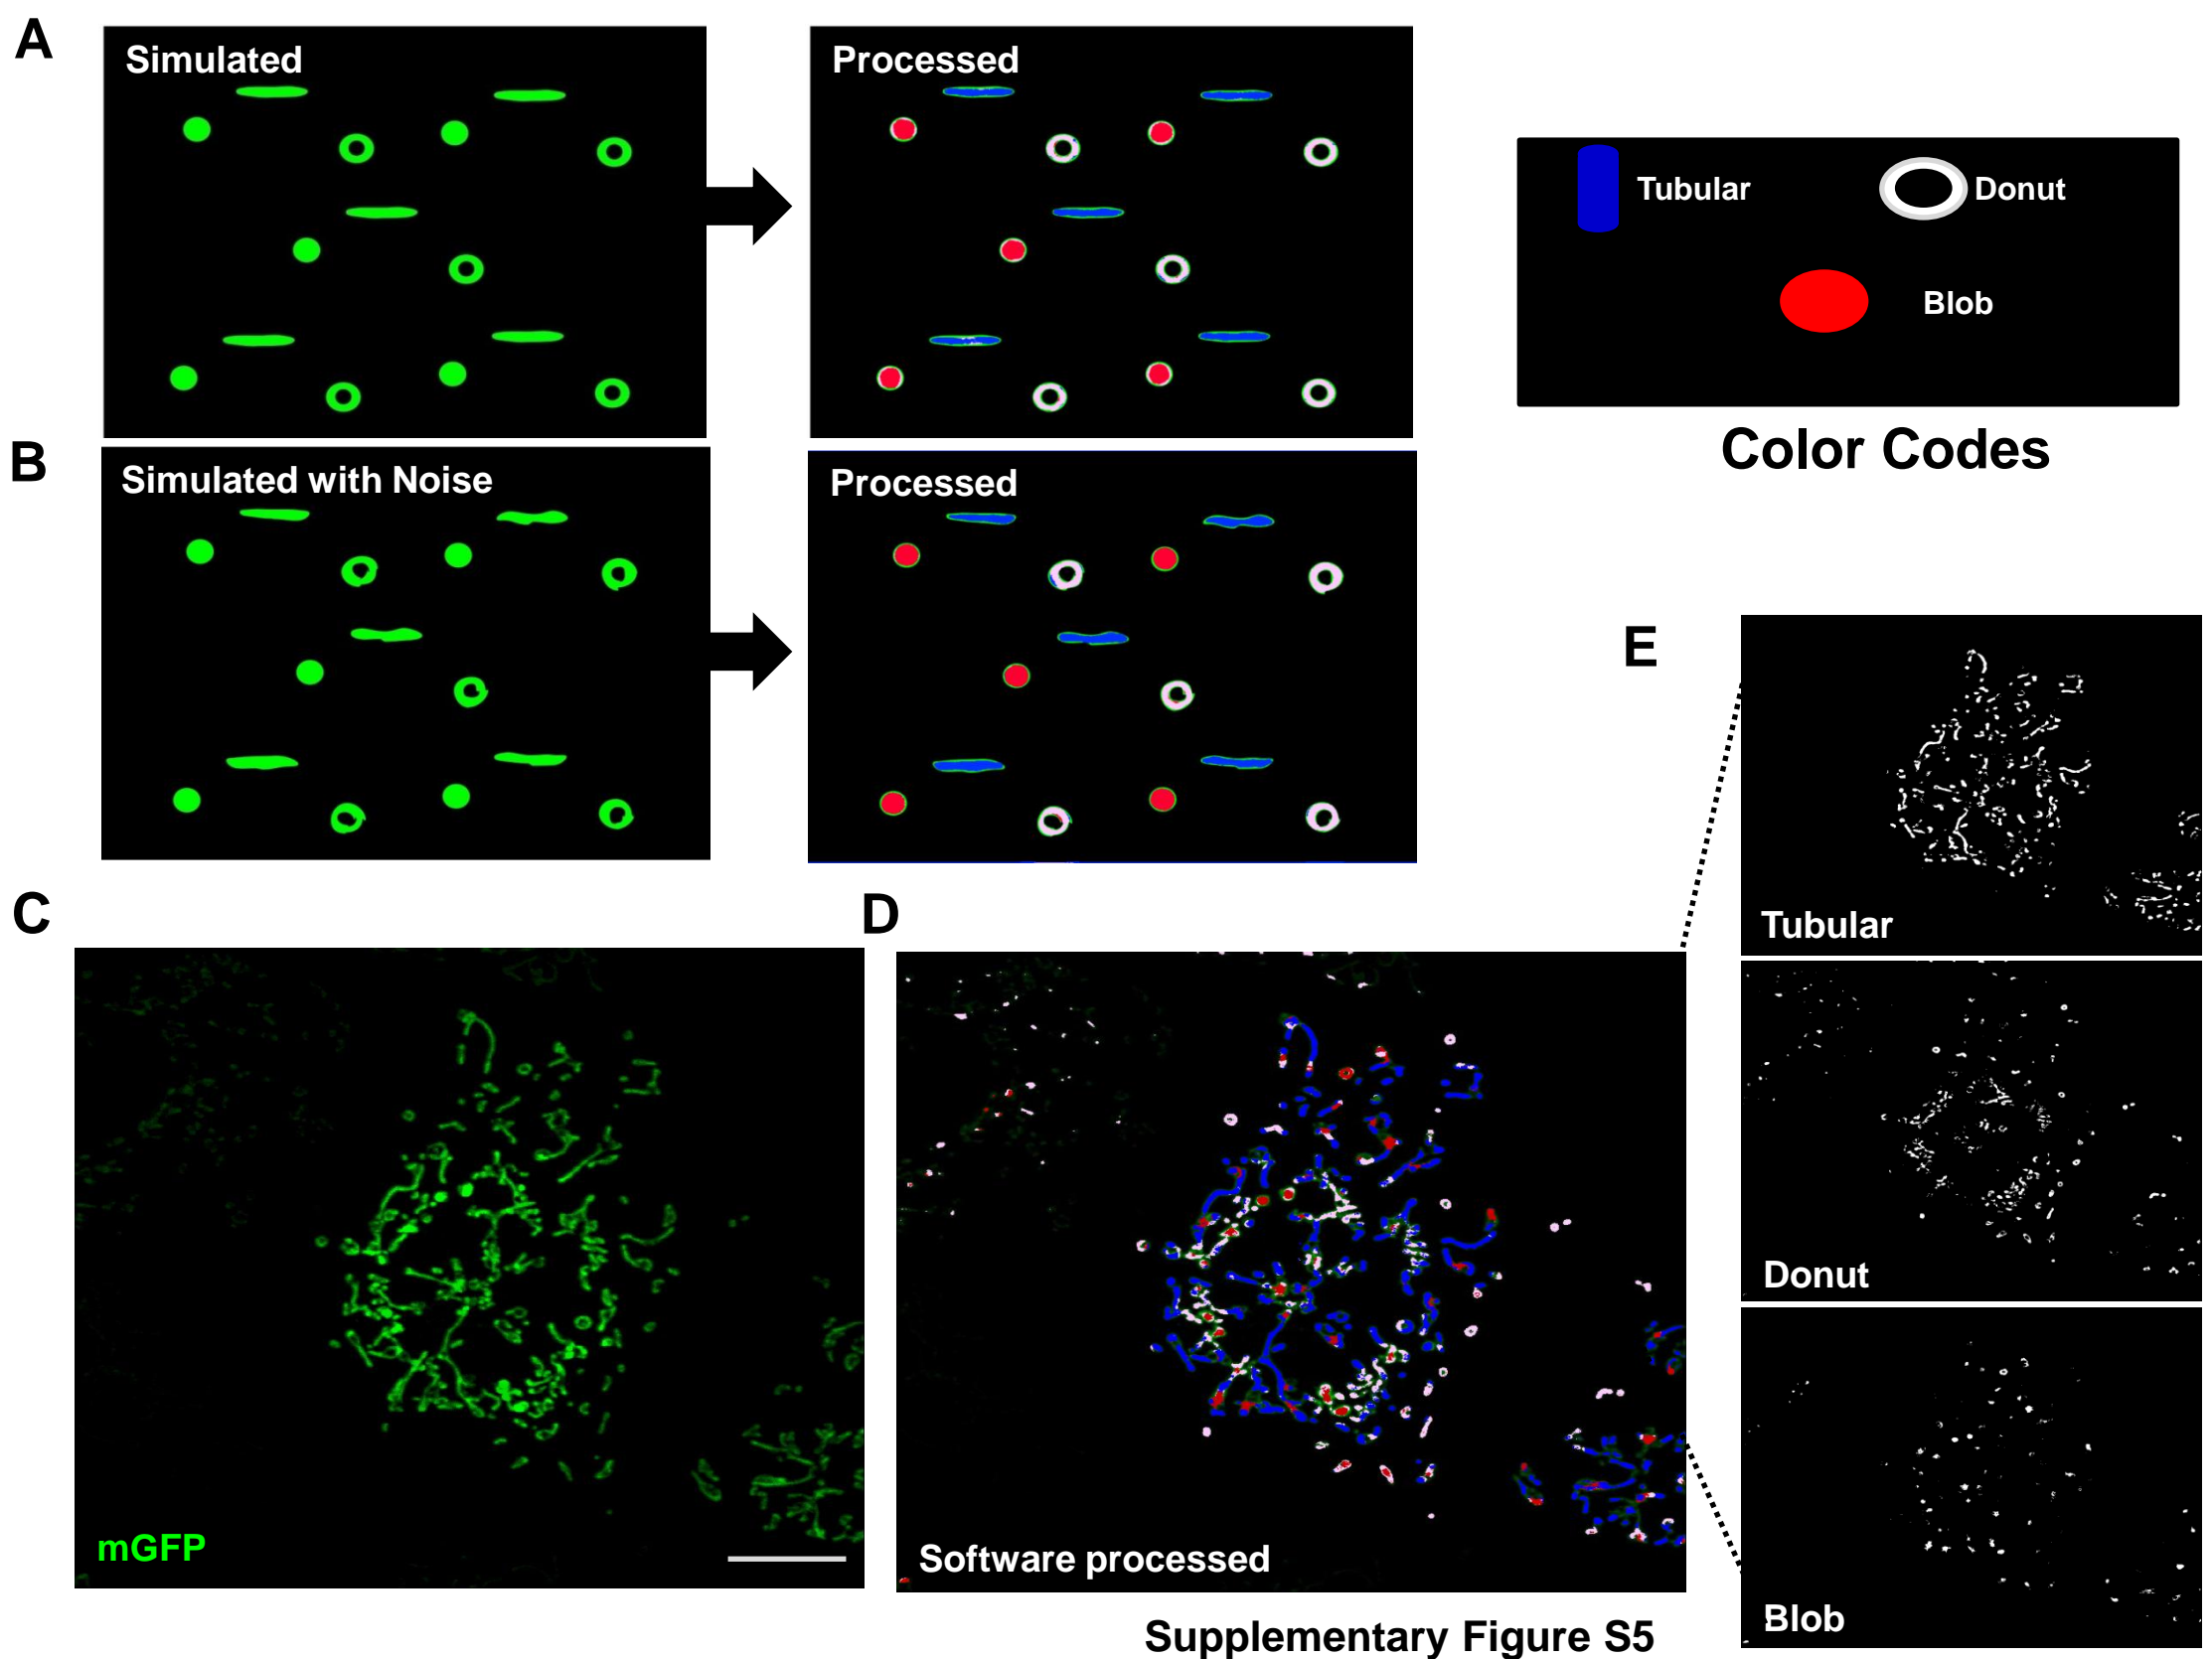

Supplementary Figure S5

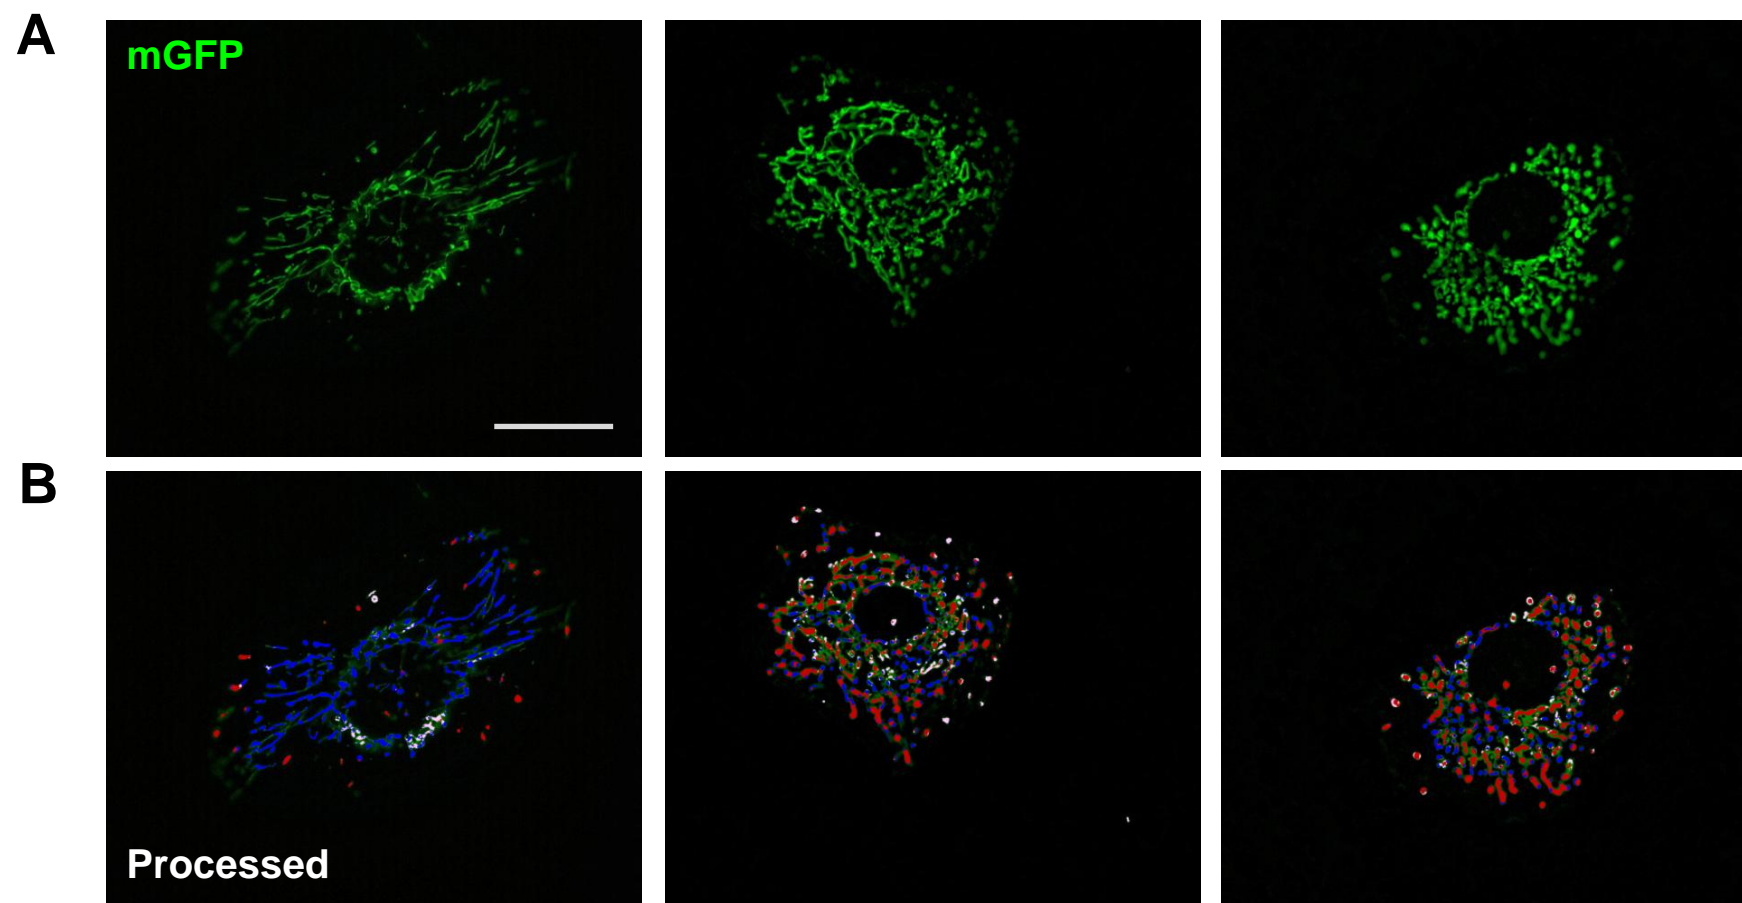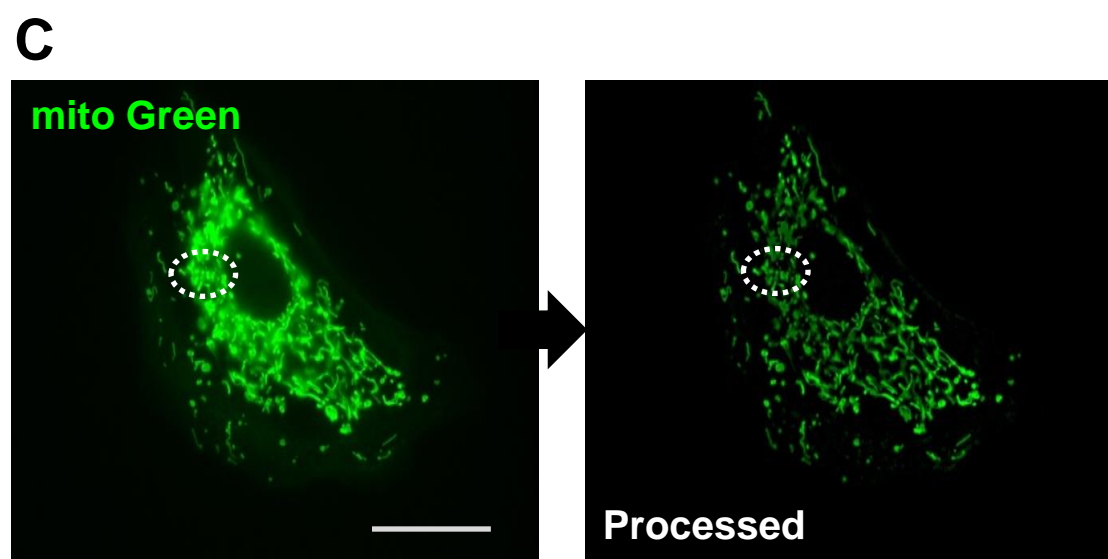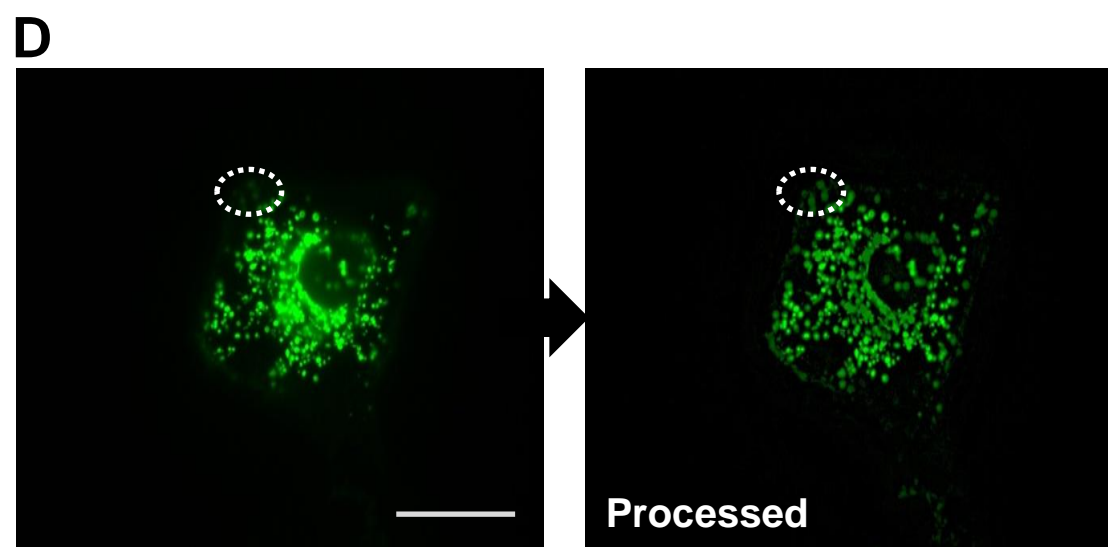

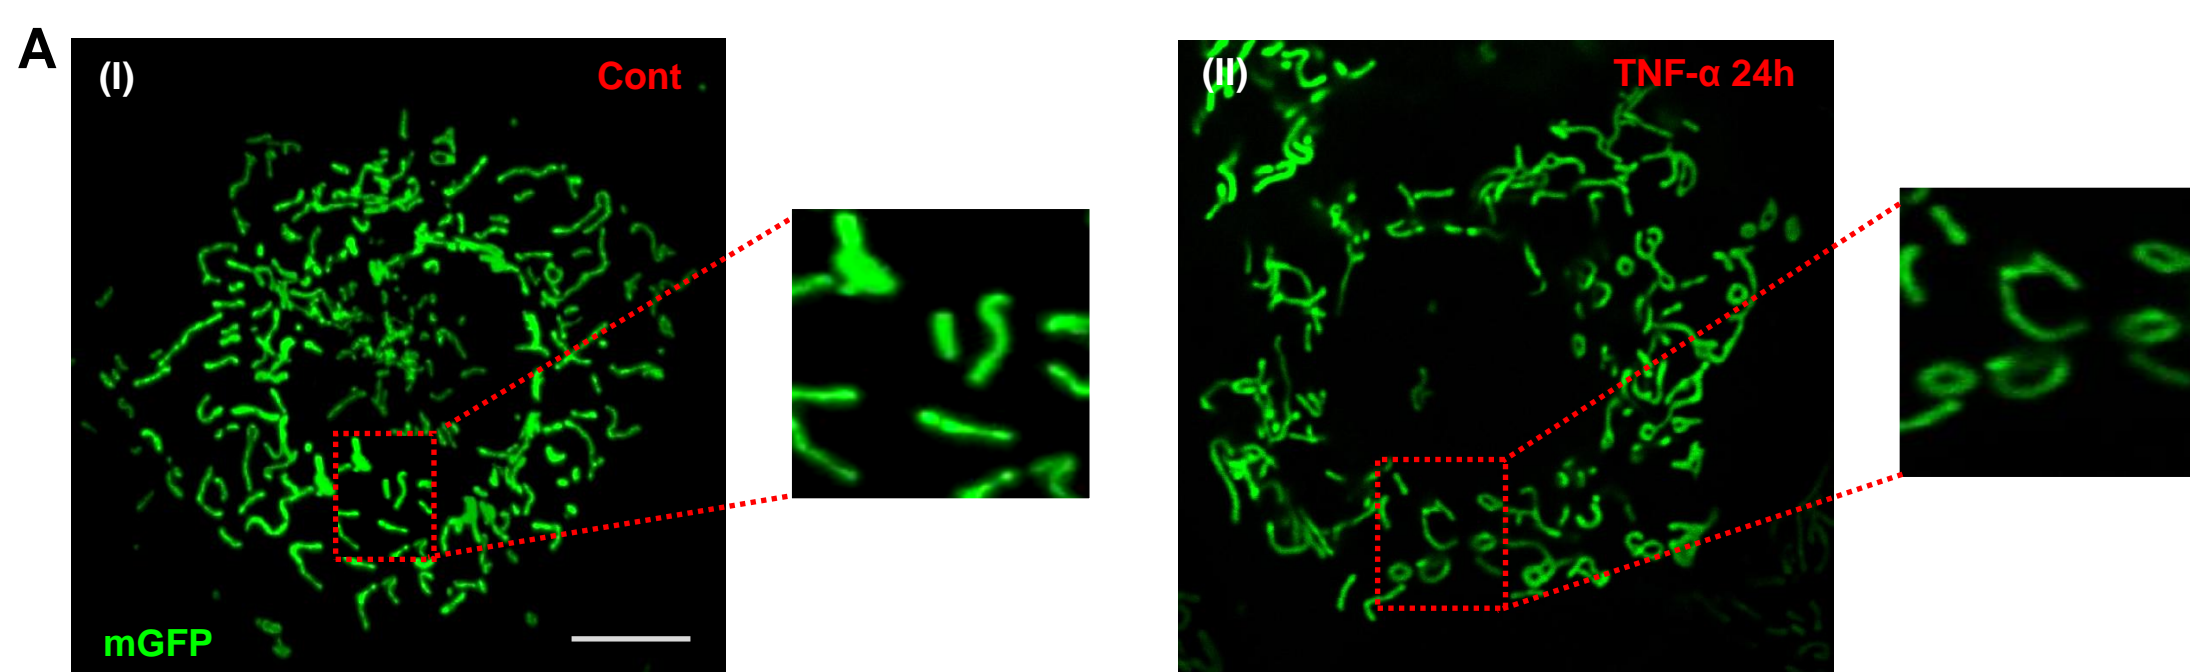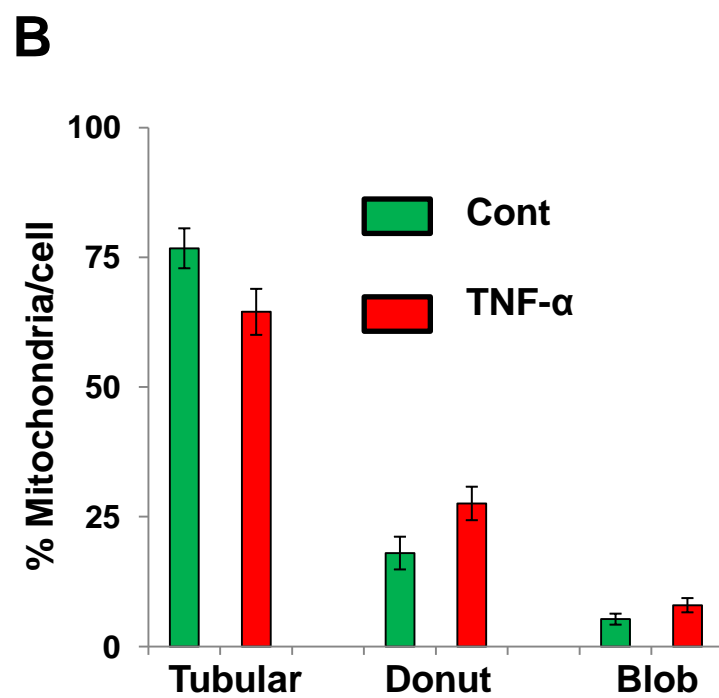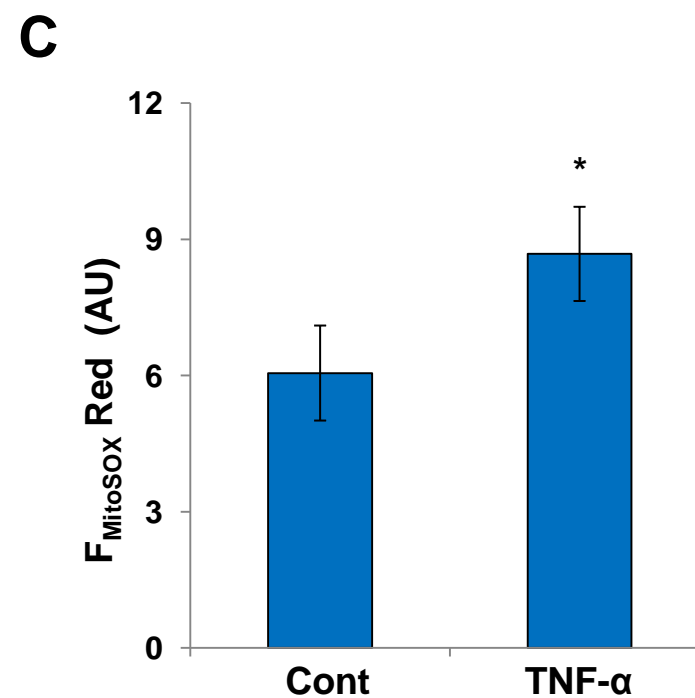

Supplement: cddis2012213x1.pdf [file cddis2012213x1.pdf]
